# Supplementary material for: Nonprobability Web Surveys to Measure Sexual Behaviors and Attitudes in the General Population: A Comparison With a Probability Sample Interview Survey
Source: PubMed Central journal article supplement (PMC4275497; doi:10.2196/jmir.3382), 2014-12-08
Supplement: jmir_v16i12e276_app1.pdf [file jmir_v16i12e276_app1.pdf]

| Questionnaire topic                                                                                            | CAPI | CASI |
|----------------------------------------------------------------------------------------------------------------|------|------|
| General health, health conditions, medications taken, medical procedures (that may affect a person's sex life) | X    |      |
| Family when growing up                                                                                         | X    |      |
| Learning about sex                                                                                             | X    |      |
| First heterosexual experience                                                                                  | X    |      |
| Contraception used                                                                                             | X    |      |
| Periods, menopause and use of hormone replacement therapy                                                      | X    |      |
| Experience of different heterosexual practices (vaginal, oral and anal intercourse)                            |      | X    |
| Opposite-sex sex in the last 4 weeks and condom use                                                            |      | X    |
| Same-sex sexual experiences (types of sexual practices, sex in last 4 weeks)                                   |      | X    |
| Number of opposite-sex partners in different time periods (lifetime, 5 years, 1 year, 3 months)                |      | X    |
| Number of same-sex partners in different time periods                                                          |      | X    |
| Details of most recent partners                                                                                |      | X    |
| Having sex with people from other countries and while abroad                                                   |      | X    |
| Non-volitional sex                                                                                             |      | X    |
| Paying for sex                                                                                                 |      | X    |
| Family formation, pregnancy history and unplanned pregnancy                                                    |      | X    |
| Fertility intentions and infertility                                                                           |      | X    |
| STI diagnoses and clinic attendance, HPV vaccination and cervical screening                                    |      | X    |
| Circumcision                                                                                                   |      | X    |
| HIV testing                                                                                                    |      | X    |
| Sexual function and satisfaction                                                                               |      | X    |
| Use of Viagra                                                                                                  |      | X    |
| Use of recreational drugs                                                                                      |      | X    |
| Screen for depressive symptoms                                                                                 |      | X    |
| Attitudes to different kinds of relationship and sexual lifestyles                                             | X    |      |
| Perceived risk of HIV and other STIs                                                                           | X    |      |
| Previous live-in partnerships                                                                                  | X    |      |

Socio-demographics

X

The web surveys did not include all the questionnaire topics covered by Natsal-3 and, for some topics, included only some of the questions used in Natsal-3.
