# Supplementary material for: Nonprobability Web Surveys to Measure Sexual Behaviors and Attitudes in the General Population: A Comparison With a Probability Sample Interview Survey
Source: PubMed Central journal article supplement (PMC4275497; doi:10.2196/jmir.3382), 2014-12-08
Supplement: jmir_v16i12e276_app4.pdf [file jmir_v16i12e276_app4.pdf]

|                                      | <b>WS-M1</b><br>Achieved/target (ratio) | <b>WS-M2</b><br>Achieved/target (ratio) |
|--------------------------------------|-----------------------------------------|-----------------------------------------|
| <b>Age within sex</b>                |                                         |                                         |
| <b>Men</b>                           |                                         |                                         |
| 18-24                                | 268/267 (1.00)                          | 228/267 (0.85)                          |
| 25-34                                | 352/360 (0.98)                          | 420/360 (1.17)                          |
| 35-44                                | 389/382 (1.02)                          | 382/382 (1.0)                           |
| <b>Women</b>                         |                                         |                                         |
| 18-24                                | 252/252 (1.0)                           | 252/252 (1.0)                           |
| 25-34                                | 350/350 (1.0)                           | 350/350 (1.0)                           |
| 35-44                                | 389/389 (1.0)                           | 389/389 (1.0)                           |
| <b>Partnership status within sex</b> |                                         |                                         |
| <b>Men</b>                           |                                         |                                         |
| Married/living as married            | 555/555 (1.0)                           | 562/555 (1.01)                          |
| All others                           | 454/454 (1.0)                           | 468/454 (1.03)                          |
| <b>Women</b>                         |                                         |                                         |
| Married/living as married            | 565/565 (1.0)                           | 565/565 (1.0)                           |
| All others                           | 426/426 (1.0)                           | 426/426 (1.0)                           |
| <b>Region</b>                        |                                         |                                         |
| London                               | 318/320 (0.99)                          | n.a.                                    |
| All others                           | 1682/1680 (1.00)                        | n.a.                                    |
| <b>Age left full-time education</b>  |                                         |                                         |
| 16 or under                          | 550/640 (0.86)                          | 577/640 (0.90)                          |
| 17-19                                | 553/520 (1.06)                          | 547/520 (1.05)                          |
| 20+                                  | 642/600 (1.07)                          | 641/600 (1.07)                          |
| Still in full-time education         | 255/240 (1.06)                          | 256/240 (1.07)                          |
| <b>Any &lt;18s in household</b>      |                                         |                                         |
| None                                 | 994/1000 (0.99)                         | n.a.                                    |
| 1+                                   | 1006/1000 (1.01)                        | n.a.                                    |
| <b>Persons living in household</b>   |                                         |                                         |
| 1                                    | n.a.                                    | 208/200 (1.04)                          |
| 2 - 3                                | n.a.                                    | 989/940 (1.05)                          |
| 4 or more                            | n.a.                                    | 824/860 (0.96)                          |
| <b>Frequency of drinking alcohol</b> |                                         |                                         |
| 3+ times per week                    | n.a.                                    | 406/420 (0.97)                          |
| 1-2 per week                         | n.a.                                    | 923/860 (1.07)                          |
| Less often                           | n.a.                                    | 692/720 (0.96)                          |
| <b>Attitude to same-gender sex</b>   |                                         |                                         |
| Always/mostly wrong                  | n.a.                                    | 469/540 (0.87)                          |
| Sometimes/rarely/never wrong         | n.a.                                    | 1444/1380 (1.05)                        |
| Depends/don't know                   | n.a.                                    | 108/80 (1.35)                           |

n.a. = not applicable
