# Supplementary material for: Nonprobability Web Surveys to Measure Sexual Behaviors and Attitudes in the General Population: A Comparison With a Probability Sample Interview Survey
Source: PubMed Central journal article supplement (PMC4275497; doi:10.2196/jmir.3382), 2014-12-08
Supplement: jmir_v16i12e276_app5.pdf [file jmir_v16i12e276_app5.pdf]

| MEN                                                  | WS-B1 | WS-B2 | WS-M1 | WS-M2 | Natsal-3 | General population |
|------------------------------------------------------|-------|-------|-------|-------|----------|--------------------|
| <b>Age group<sup>a</sup></b>                         |       |       |       |       |          |                    |
| 18-24                                                | 26.0% | 26.0% | 26.0% | 26.0% | 26.0%    | 26.0%              |
| 25-34                                                | 36.3% | 36.3% | 36.3% | 36.3% | 36.3%    | 36.3%              |
| 35-44                                                | 37.7% | 37.7% | 37.7% | 37.7% | 37.7%    | 37.7%              |
| <b>Marital status<sup>a,d</sup></b>                  |       |       |       |       |          |                    |
| Married, living with spouse                          | 28.3% | 35.1% | 43.7% | 31.1% | 37.7%    | 31.3%              |
| Other                                                | 71.7% | 64.9% | 56.3% | 68.9% | 62.3%    | 68.7%              |
| <b>Age completed full-time education<sup>b</sup></b> |       |       |       |       |          |                    |
| Under 16                                             | 4.0%  | 5.0%  | 6.1%  | 4.4%  | 6.7%     | 5.0%               |
| 16-19                                                | 31.2% | 43.7% | 48.9% | 49.2% | 51.0%    | 56.2%              |
| 20+                                                  | 49.8% | 38.8% | 32.1% | 34.7% | 29.8%    | 27.8%              |
| Still in full-time education                         | 15.0% | 12.5% | 12.9% | 11.6% | 12.5%    | 10.8%              |
| <b>Household size<sup>b</sup></b>                    |       |       |       |       |          |                    |
| One                                                  | 16.6% | 14.3% | 13.5% | 11.7% | 12.6%    | 24.0%              |
| Two                                                  | 31.7% | 27.9% | 23.6% | 29.7% | 23.5%    | 22.1%              |
| Three +                                              | 51.7% | 57.8% | 62.9% | 58.6% | 64.0%    | 53.9%              |
| <b>Current economic activity<sup>a,d,e</sup></b>     |       |       |       |       |          |                    |
| Still in full-time education                         | 13.9% | 11.1% | 13.2% | 9.2%  | 9.9%     | 7.1%               |
| In employment                                        | 75.8% | 70.4% | 68.5% | 74.9% | 77.1%    | 78.2%              |
| Looking after family/home                            | 1.6%  | 4.3%  | 3.9%  | 4.3%  | 1.2%     | 0.9%               |
| Other activity                                       | 8.8%  | 14.2% | 14.4% | 11.6% | 11.8%    | 13.8%              |
| <b>Sexual identity<sup>b</sup></b>                   |       |       |       |       |          |                    |
| Heterosexual                                         | 84.8% | 89.4% | 90.3% | 88.8% | 96.9%    | 96.7%              |
| Gay                                                  | 8.8%  | 5.8%  | 2.8%  | 7.9%  | 1.8%     | 2.4%               |
| Bisexual/other                                       | 6.4%  | 4.8%  | 6.9%  | 3.3%  | 1.2%     | 0.9%               |
| <b>Driving licence valid in UK<sup>c</sup></b>       |       |       |       |       |          |                    |
| Yes                                                  | 78.6% | 70.1% | 70.4% | 73.3% | 73.2%    | 75.7%              |
| No                                                   | 21.4% | 29.9% | 29.6% | 26.7% | 26.8%    | 24.3%              |
| <b>Tenure<sup>b</sup></b>                            |       |       |       |       |          |                    |
| Own/mortgage                                         | 58.5% | 49.7% | 55.2% | 49.2% | 51.9%    | 56.7%              |
| Other                                                | 41.5% | 50.3% | 44.8% | 50.8% | 48.1%    | 43.3%              |
| <b>General health<sup>a,d</sup></b>                  |       |       |       |       |          |                    |
| Very good/good                                       | 78.9% | 80.2% | 78.7% | 71.4% | 88.7%    | 91.2%              |
| Fair/bad/very bad                                    | 21.1% | 19.8% | 21.3% | 28.6% | 11.3%    | 8.8%               |
| <b>Ethnicity<sup>a,d</sup></b>                       |       |       |       |       |          |                    |
| White                                                | 91.3% | 84.8% | 84.5% | 92.8% | 81.8%    | 81.9%              |
| Mixed                                                | 1.9%  | 2.0%  | 2.2%  | 0.9%  | 2.4%     | 2.2%               |
| Asian                                                | 4.4%  | 9.5%  | 9.3%  | 4.0%  | 9.6%     | 10.4%              |
| Black                                                | 1.0%  | 1.8%  | 2.9%  | 1.3%  | 4.3%     | 3.8%               |
| Chinese/other                                        | 1.4%  | 1.8%  | 1.1%  | 0.9%  | 1.8%     | 1.6%               |

Sources of general population data:

a=Census 2011; b=Integrated Household Survey 2011; c=National Travel Survey 2010. d=Data for England & Wales only.

e=For current economic activity, some of the differences in the estimates between the web surveys, Natsal-3 and census may be due to small variations in the way the questions were asked and coded.

| WOMEN                                                | WS-B1 | WS-B2 | WS-M1 | WS-M2 | Natsal-3 | General population |
|------------------------------------------------------|-------|-------|-------|-------|----------|--------------------|
| <b>Age group<sup>a</sup></b>                         |       |       |       |       |          |                    |
| 18-24                                                | 25.3% | 25.3% | 25.3% | 25.3% | 25.3%    | 25.3%              |
| 25-34                                                | 36.4% | 36.4% | 36.4% | 36.4% | 36.4%    | 36.4%              |
| 35-44                                                | 38.4% | 38.4% | 38.4% | 38.4% | 38.4%    | 38.4%              |
| <b>Marital status<sup>a,d</sup></b>                  |       |       |       |       |          |                    |
| Married, living with spouse                          | 34.6% | 39.9% | 43.3% | 39.9% | 40.0%    | 35.9%              |
| Other                                                | 65.4% | 60.1% | 56.7% | 60.1% | 60.0%    | 64.1%              |
| <b>Age completed full-time education<sup>b</sup></b> |       |       |       |       |          |                    |
| Under 16                                             | 3.8%  | 3.0%  | 6.8%  | 5.7%  | 6.1%     | 5.2%               |
| 16-19                                                | 31.5% | 48.1% | 48.2% | 52.3% | 51.0%    | 55.3%              |
| 20+                                                  | 48.6% | 34.9% | 32.6% | 26.5% | 30.9%    | 29.4%              |
| Still in full-time education                         | 16.1% | 14.0% | 12.5% | 15.6% | 12.0%    | 9.8%               |
| <b>Household size<sup>b</sup></b>                    |       |       |       |       |          |                    |
| One                                                  | 12.5% | 11.2% | 12.7% | 5.1%  | 8.1%     | 13.3%              |
| Two                                                  | 32.2% | 28.6% | 27.2% | 23.9% | 23.7%    | 26.9%              |
| Three +                                              | 55.3% | 60.2% | 60.0% | 71.0% | 68.2%    | 59.8%              |
| <b>Current economic activity<sup>a,d,e</sup></b>     |       |       |       |       |          |                    |
| Still in full-time education                         | 13.5% | 12.2% | 9.0%  | 10.0% | 8.8%     | 7.0%               |
| In employment                                        | 67.9% | 58.2% | 56.9% | 60.1% | 65.1%    | 70.3%              |
| Looking after family/home                            | 11.9% | 19.0% | 21.0% | 18.9% | 17.7%    | 10.9%              |
| Other activity                                       | 6.7%  | 10.6% | 13.1% | 11.1% | 8.4%     | 11.7%              |
| <b>Sexual identity<sup>b</sup></b>                   |       |       |       |       |          |                    |
| Heterosexual                                         | 90.8% | 92.3% | 92.5% | 92.6% | 96.1%    | 97.9%              |
| Gay                                                  | 2.2%  | 1.2%  | 2.3%  | 1.3%  | 1.3%     | 1.1%               |
| Bisexual/other                                       | 7.0%  | 6.5%  | 5.2%  | 6.1%  | 2.6%     | 1.0%               |
| <b>Driving licence valid in UK<sup>c</sup></b>       |       |       |       |       |          |                    |
| Yes                                                  | 76.1% | 66.2% | 62.7% | 68.2% | 70.5     | 68.8%              |
| No                                                   | 23.9% | 33.8% | 37.3% | 31.8% | 29.5     | 31.2%              |
| <b>Tenure<sup>b</sup></b>                            |       |       |       |       |          |                    |
| Own/mortgage                                         | 54.7% | 47.8% | 49.0% | 47.2% | 50.8%    | 55.5%              |
| Other                                                | 45.3% | 52.2% | 51.0% | 52.8% | 49.2%    | 44.5%              |
| <b>General health<sup>a,d</sup></b>                  |       |       |       |       |          |                    |
| Very good/good                                       | 78.3% | 78.9% | 75.9% | 74.0% | 87.9%    | 90.2%              |
| Fair/bad/very bad                                    | 21.7% | 21.1% | 24.1% | 26.0% | 12.1%    | 9.8%               |
| <b>Ethnicity<sup>a,d</sup></b>                       |       |       |       |       |          |                    |
| White                                                | 94.3% | 87.4% | 86.6% | 90.3% | 82.7%    | 82.2%              |
| Mixed                                                | 2.0%  | 2.5%  | 1.7%  | 2.4%  | 2.7%     | 2.3%               |
| Asian                                                | 2.1%  | 6.5%  | 7.0%  | 2.6%  | 8.2%     | 10.1%              |
| Black                                                | 0.6%  | 2.6%  | 3.0%  | 2.8%  | 4.6%     | 4.2%               |
| Chinese/other                                        | 1.0%  | 1.0%  | 1.6%  | 1.9%  | 1.8%     | 1.2%               |

Sources of general population data:

a=Census 2011; b=Integrated Household Survey 2011; c=National Travel Survey 2010. d=Data for England & Wales only.

e=For current economic activity, some of the differences in the estimates between the web surveys, Natsal-3 and census may be due to small variations in the way the questions were asked and coded.
