# Supplementary material for: Nonprobability Web Surveys to Measure Sexual Behaviors and Attitudes in the General Population: A Comparison With a Probability Sample Interview Survey
Source: PubMed Central journal article supplement (PMC4275497; doi:10.2196/jmir.3382), 2014-12-08
Supplement: jmir_v16i12e276_app6.pdf [file jmir_v16i12e276_app6.pdf]

| <b>MEN</b>                                                | <b>WS-B1</b>        | <b>WS-B2</b>        | <b>WS-M1</b>        | <b>WS-M2</b>        | <b>Natsal-3</b>     |
|-----------------------------------------------------------|---------------------|---------------------|---------------------|---------------------|---------------------|
| Current economic activity: in employment <sup>a,d,e</sup> | 0.88<br>[0.74,1.03] | 0.66<br>[0.57,0.76] | 0.61<br>[0.53,0.69] | 0.83<br>[0.72,0.97] | 0.94<br>[0.85,1.03] |
| Sexual identity: not heterosexual <sup>b</sup>            | 5.23<br>[4.37,6.19] | 3.45<br>[2.81,4.20] | 3.13<br>[2.52,3.83] | 3.66<br>[3.00,4.43] | 0.92<br>[0.72,1.16] |
| Has driving licence valid in UK <sup>c</sup>              | 1.17<br>[0.98,1.39] | 0.79<br>[0.67,0.92] | 0.77<br>[0.65,0.90] | 0.88<br>[0.75,1.04] | 1.14<br>[0.94,1.39] |
| Tenure: own/mortgage <sup>b</sup>                         | 1.08<br>[0.95,1.23] | 0.75<br>[0.67,0.85] | 0.94<br>[0.83,1.07] | 0.74<br>[0.65,0.84] | 0.82<br>[0.76,0.89] |
| General health: very good/ good <sup>a,d</sup>            | 0.36<br>[0.31,0.42] | 0.39<br>[0.33,0.46] | 0.36<br>[0.31,0.42] | 0.24<br>[0.21,0.28] | 0.76<br>[0.67,0.86] |
| Ethnicity: non-white <sup>a,d</sup>                       | 0.43<br>[0.34,0.54] | 0.81<br>[0.67,0.97] | 0.83<br>[0.70,0.99] | 0.35<br>[0.28,0.45] | 1.00<br>[0.89,1.13] |
| <b>WOMEN</b>                                              |                     |                     |                     |                     |                     |
| Current economic activity: in employment <sup>a,d,e</sup> | 0.89<br>[0.78,1.02] | 0.59<br>[0.51,0.67] | 0.56<br>[0.49,0.63] | 0.63<br>[0.56,0.72] | 0.79<br>[0.73,0.84] |
| Sexual identity: not heterosexual <sup>b</sup>            | 4.78<br>[3.84,5.84] | 3.94<br>[3.09,4.93] | 3.83<br>[3.00,4.81] | 3.77<br>[2.94,4.75] | 1.91<br>[1.61,2.74] |
| Has driving licence valid in UK <sup>c</sup>              | 1.44<br>[1.23,1.69] | 0.88<br>[0.76,1.03] | 0.76<br>[0.66,0.88] | 0.97<br>[0.83,1.13] | 0.92<br>[0.79,1.08] |
| Tenure: own/mortgage <sup>b</sup>                         | 0.97<br>[0.86,1.10] | 0.74<br>[0.65,0.84] | 0.77<br>[0.68,0.88] | 0.72<br>[0.63,0.82] | 0.83<br>[0.78,0.89] |
| General health: very good/ good <sup>a,d</sup>            | 0.39<br>[0.34,0.46] | 0.41<br>[0.35,0.48] | 0.34<br>[0.30,0.40] | 0.31<br>[0.27,0.36] | 0.79<br>[0.72,0.88] |
| Ethnicity: non-white <sup>a,d</sup>                       | 0.28<br>[0.21,0.37] | 0.67<br>[0.55,0.81] | 0.71<br>[0.59,0.86] | 0.50<br>[0.40,0.62] | 0.96<br>[0.87,1.07] |

Sources of general population data:

a=Census 2011; b=Integrated Household Survey 2011; c=National Travel Survey 2010. d=Data for England & Wales only.

e=For current economic activity, some of the differences in the estimates between the web surveys, Natsal-3 and census may be due to small variations in the way the questions were asked and coded.
