# Supplementary material for: Nonprobability Web Surveys to Measure Sexual Behaviors and Attitudes in the General Population: A Comparison With a Probability Sample Interview Survey
Source: PubMed Central journal article supplement (PMC4275497; doi:10.2196/jmir.3382), 2014-12-08
Supplement: jmir_v16i12e276_app7.pdf [file jmir_v16i12e276_app7.pdf]

| MEN                                                | WS-B1 | WS-B2 | WS-M1 | WS-M2 | Natsal-3 |
|----------------------------------------------------|-------|-------|-------|-------|----------|
| <b>One night stands</b>                            |       |       |       |       |          |
| Always wrong                                       | 12.0% | 17.8% | 16.2% | 12.4% | 21.1%    |
| Mostly wrong                                       | 14.9% | 14.7% | 16.7% | 14.5% | 14.6%    |
| Sometimes wrong                                    | 26.2% | 25.5% | 21.0% | 30.0% | 30.2%    |
| Rarely wrong                                       | 11.5% | 8.7%  | 9.4%  | 12.4% | 10.4%    |
| Not wrong                                          | 19.6% | 17.2% | 19.9% | 17.6% | 19.8%    |
| Depends/DK                                         | 15.8% | 16.1% | 16.9% | 13.1% | 4.0%     |
| <b>Adultery</b>                                    |       |       |       |       |          |
| Always wrong                                       | 38.0% | 45.2% | 46.0% | 38.5% | 61.7%    |
| Mostly wrong                                       | 38.0% | 29.4% | 27.8% | 36.5% | 24.9%    |
| Sometimes wrong                                    | 10.7% | 12.3% | 11.8% | 13.5% | 9.7%     |
| Rarely wrong                                       | 1.2%  | 1.0%  | 2.1%  | 1.9%  | 1.1%     |
| Not wrong                                          | 1.9%  | 3.0%  | 3.2%  | 1.5%  | 1.5%     |
| Depends/DK                                         | 10.3% | 9.1%  | 9.1%  | 8.2%  | 1.2%     |
| <b>Sex between men</b>                             |       |       |       |       |          |
| Always wrong                                       | 13.4% | 23.2% | 23.5% | 14.9% | 26.6%    |
| Mostly wrong                                       | 4.6%  | 7.8%  | 7.0%  | 9.8%  | 8.3%     |
| Sometimes wrong                                    | 5.5%  | 6.0%  | 7.2%  | 9.7%  | 7.4%     |
| Rarely wrong                                       | 8.8%  | 5.7%  | 5.5%  | 8.0%  | 7.2%     |
| Not wrong                                          | 54.4% | 39.3% | 40.0% | 50.5% | 46.4%    |
| Depends/DK                                         | 13.3% | 18.0% | 16.9% | 7.2%  | 4.0%     |
| <b>Sex between women</b>                           |       |       |       |       |          |
| Always wrong                                       | 7.5%  | 14.1% | 14.1% | 8.1%  | 17.5%    |
| Mostly wrong                                       | 4.7%  | 7.1%  | 6.9%  | 6.9%  | 8.8%     |
| Sometimes wrong                                    | 7.8%  | 7.7%  | 8.3%  | 9.9%  | 10.1%    |
| Rarely wrong                                       | 8.9%  | 8.8%  | 7.4%  | 11.8% | 9.1%     |
| Not wrong                                          | 59.0% | 45.7% | 48.2% | 54.6% | 50.5%    |
| Depends/DK                                         | 12.2% | 16.7% | 15.1% | 8.8%  | 4.1%     |
| <b>Talk to parents about sex</b>                   |       |       |       |       |          |
| Easy                                               | 8.9%  | 13.4% | 16.1% | 15.0% | 18.4%    |
| Difficult                                          | 12.5% | 13.4% | 13.8% | 11.7% | 9.1%     |
| Didn't                                             | 69.8% | 65.7% | 59.5% | 64.2% | 69.9%    |
| Depends on topic                                   | 8.8%  | 7.5%  | 10.7% | 9.1%  | 2.7%     |
| <b>Satisfied with sex life<sup>a</sup></b>         |       |       |       |       |          |
| Agree strongly                                     | 13.3% | 21.4% | 19.8% | 17.3% | 25.2%    |
| Agree                                              | 29.3% | 31.8% | 36.9% | 32.6% | 40.5%    |
| Neither                                            | 23.0% | 20.7% | 15.8% | 20.2% | 17.8%    |
| Disagree                                           | 22.7% | 16.7% | 17.0% | 18.2% | 13.5%    |
| Disagree strongly                                  | 11.2% | 9.5%  | 9.8%  | 11.7% | 3.0%     |
| <b>Distressed about sex life<sup>a</sup></b>       |       |       |       |       |          |
| Agree strongly                                     | 2.4%  | 4.5%  | 3.7%  | 2.8%  | 1.7%     |
| Agree                                              | 12.3% | 14.6% | 16.3% | 16.2% | 8.1%     |
| Neither                                            | 26.4% | 22.4% | 21.7% | 23.4% | 18.3%    |
| Disagree                                           | 36.8% | 31.1% | 28.8% | 28.5% | 37.9%    |
| Disagree strongly                                  | 22.1% | 27.5% | 29.5% | 29.1% | 34.0%    |
| <b>Avoided sex because of problems<sup>a</sup></b> |       |       |       |       |          |
| Agree strongly                                     | 1.6%  | 2.4%  | 3.2%  | 3.2%  | 1.4%     |
| Agree                                              | 13.3% | 11.7% | 11.8% | 9.2%  | 7.7%     |
| Neither                                            | 16.7% | 15.6% | 13.6% | 15.9% | 10.4%    |
| Disagree                                           | 32.2% | 27.4% | 27.5% | 24.6% | 33.0%    |
| Disagree strongly                                  | 36.3% | 43.0% | 43.9% | 47.2% | 47.4%    |

Questions in green were asked in CAPI, questions in black were asked in CASI.

a=The base for these questions is limited to participants who answered the CASI questionnaire.

| <b>WOMEN</b>                                       | <b>WS-B1</b> | <b>WS-B2</b> | <b>WS-M1</b> | <b>WS-M2</b> | <b>Natsal-3</b> |
|----------------------------------------------------|--------------|--------------|--------------|--------------|-----------------|
| <b>One night stands</b>                            |              |              |              |              |                 |
| Always wrong                                       | 15.3%        | 19.9%        | 22.7%        | 18.4%        | 29.0%           |
| Mostly wrong                                       | 18.8%        | 20.1%        | 18.6%        | 19.2%        | 18.4%           |
| Sometimes wrong                                    | 27.0%        | 26.1%        | 26.7%        | 28.7%        | 28.2%           |
| Rarely wrong                                       | 8.4%         | 5.6%         | 5.9%         | 8.2%         | 7.2%            |
| Not wrong                                          | 14.7%        | 13.2%        | 11.3%        | 11.8%        | 12.9%           |
| Depends/DK                                         | 15.8%        | 15.1%        | 14.9%        | 13.9%        | 4.3%            |
| <b>Adultery</b>                                    |              |              |              |              |                 |
| Always wrong                                       | 54.0%        | 58.7%        | 60.5%        | 56.8%        | 68.8%           |
| Mostly wrong                                       | 34.0%        | 26.3%        | 23.6%        | 31.4%        | 21.6%           |
| Sometimes wrong                                    | 6.4%         | 7.7%         | 6.4%         | 6.1%         | 7.3%            |
| Rarely wrong                                       | 0.7%         | 0.5%         | 0.9%         | 0.7%         | 0.5%            |
| Not wrong                                          | 0.6%         | 1.2%         | 2.0%         | 0.7%         | 0.7%            |
| Depends/DK                                         | 4.4%         | 5.6%         | 6.6%         | 4.3%         | 1.1%            |
| <b>Sex between men</b>                             |              |              |              |              |                 |
| Always wrong                                       | 7.0%         | 11.7%        | 13.7%        | 13.9%        | 13.5%           |
| Mostly wrong                                       | 2.1%         | 5.2%         | 3.4%         | 7.8%         | 4.6%            |
| Sometimes wrong                                    | 4.5%         | 5.1%         | 5.0%         | 6.2%         | 6.1%            |
| Rarely wrong                                       | 7.9%         | 7.1%         | 7.8%         | 10.2%        | 8.2%            |
| Not wrong                                          | 64.3%        | 56.0%        | 55.6%        | 58.4%        | 63.9%           |
| Depends/DK                                         | 14.3%        | 15.0%        | 14.5%        | 3.5%         | 3.7%            |
| <b>Sex between women</b>                           |              |              |              |              |                 |
| Always wrong                                       | 6.3%         | 11.9%        | 13.4%        | 15.5%        | 13.5%           |
| Mostly wrong                                       | 1.9%         | 4.4%         | 3.8%         | 6.4%         | 4.5%            |
| Sometimes wrong                                    | 4.8%         | 5.6%         | 4.6%         | 6.2%         | 6.2%            |
| Rarely wrong                                       | 8.2%         | 7.5%         | 7.7%         | 9.7%         | 8.4%            |
| Not wrong                                          | 65.0%        | 56.3%        | 56.1%        | 58.1%        | 63.8%           |
| Depends/DK                                         | 13.8%        | 14.3%        | 14.4%        | 4.3%         | 3.7%            |
| <b>Talk to parents about sex</b>                   |              |              |              |              |                 |
| Easy                                               | 15.9%        | 14.9%        | 15.0%        | 15.4%        | 25.2%           |
| Difficult                                          | 12.1%        | 14.4%        | 14.2%        | 12.7%        | 12.3%           |
| Didn't                                             | 58.1%        | 58.3%        | 58.3%        | 59.9%        | 59.0%           |
| Depends on topic                                   | 14.0%        | 12.4%        | 12.6%        | 11.9%        | 3.5%            |
| <b>Satisfied with sex life<sup>a</sup></b>         |              |              |              |              |                 |
| Agree strongly                                     | 15.6%        | 21.6%        | 18.7%        | 17.5%        | 27.3%           |
| Agree                                              | 35.3%        | 33.6%        | 34.0%        | 33.7%        | 39.8%           |
| Neither                                            | 20.3%        | 20.1%        | 21.0%        | 19.4%        | 19.9%           |
| Disagree                                           | 18.9%        | 15.4%        | 17.0%        | 19.3%        | 10.2%           |
| Disagree strongly                                  | 9.4%         | 9.3%         | 8.9%         | 10.1%        | 2.9%            |
| <b>Distressed about sex life<sup>a</sup></b>       |              |              |              |              |                 |
| Agree strongly                                     | 3.6%         | 3.5%         | 3.6%         | 4.5%         | 1.7%            |
| Agree                                              | 16.7%        | 14.9%        | 16.0%        | 17.1%        | 9.4%            |
| Neither                                            | 24.0%        | 22.7%        | 23.3%        | 21.2%        | 20.2%           |
| Disagree                                           | 33.5%        | 30.2%        | 30.3%        | 30.3%        | 35.9%           |
| Disagree strongly                                  | 22.2%        | 28.7%        | 26.8%        | 26.9%        | 32.7%           |
| <b>Avoided sex because of problems<sup>a</sup></b> |              |              |              |              |                 |
| Agree strongly                                     | 4.3%         | 2.9%         | 3.6%         | 4.2%         | 2.0%            |
| Agree                                              | 15.0%        | 14.7%        | 14.8%        | 13.0%        | 8.9%            |
| Neither                                            | 14.8%        | 13.1%        | 17.4%        | 13.8%        | 11.7%           |
| Disagree                                           | 30.9%        | 29.3%        | 26.6%        | 27.4%        | 35.9%           |
| Disagree strongly                                  | 35.1%        | 40.1%        | 37.7%        | 41.6%        | 41.5%           |

Questions in green were asked in CAPI, questions in black were asked in CASI.

a=The base for these questions is limited to participants who answered the CASI questionnaire.
