# Supplementary material for: Nonprobability Web Surveys to Measure Sexual Behaviors and Attitudes in the General Population: A Comparison With a Probability Sample Interview Survey
Source: PubMed Central journal article supplement (PMC4275497; doi:10.2196/jmir.3382), 2014-12-08
Supplement: jmir_v16i12e276_app8.pdf [file jmir_v16i12e276_app8.pdf]

| <b>MEN</b>                                                  | <b>WS-B1</b>     | <b>WS-B2</b>     | <b>WS-M1</b>     | <b>WS-M2</b>     |
|-------------------------------------------------------------|------------------|------------------|------------------|------------------|
| Current smoker                                              | 0.53 [0.45,0.64] | 0.88 [0.75,1.03] | 0.94 [0.80,1.10] | 1.12 [0.96,1.31] |
| Drinks more than recommended amount (21+ units in a week)   | 1.11 [0.86,1.43] | 1.04 [0.80,1.36] | 1.10 [0.84,1.42] | 1.02 [0.78,1.33] |
| Binge drinks once a week or more (8+ units)                 | 0.75 [0.62,0.90] | 0.65 [0.54,0.79] | 0.75 [0.62,0.91] | 0.92 [0.77,1.10] |
| 1st sex % <16                                               | 0.40 [0.32,0.49] | 0.55 [0.45,0.66] | 0.52 [0.43,0.64] | 0.55 [0.45,0.66] |
| 1st sex both equally willing <sup>a</sup>                   | 0.80 [0.61,1.05] | 0.65 [0.51,0.83] | 0.73 [0.57,0.94] | 0.74 [0.57,0.94] |
| 1st sex contraception used <sup>a</sup>                     | 2.14 [1.66,2.77] | 0.73 [0.59,0.92] | 0.72 [0.57,0.90] | 0.67 [0.53,0.84] |
| 1st sex was at right time <sup>a</sup>                      | 0.61 [0.51,0.72] | 0.56 [0.48,0.67] | 0.54 [0.46,0.64] | 0.63 [0.54,0.75] |
| Sex attraction scale – not all opposite sex                 | 4.54 [3.70,5.57] | 3.11 [2.51,3.86] | 2.88 [2.31,3.58] | 3.76 [3.06,4.62] |
| Sex experience scale – not all opposite sex                 | 3.71 [2.99,4.62] | 2.68 [2.13,3.37] | 2.52 [2.00,3.17] | 3.23 [2.59,4.02] |
| Had vaginal sex last month                                  | 0.49 [0.42,0.57] | 0.55 [0.47,0.64] | 0.68 [0.59,0.80] | 0.65 [0.55,0.75] |
| Had het oral sex last year                                  | 0.45 [0.38,0.52] | 0.52 [0.44,0.61] | 0.66 [0.56,0.78] | 0.62 [0.52,0.73] |
| Had het anal sex last year                                  | 0.75 [0.61,0.93] | 1.09 [0.91,1.32] | 1.20 [1.00,1.44] | 1.02 [0.85,1.23] |
| Het sex 5+ occasions last 4 weeks <sup>b</sup>              | 1.00 [0.84,1.18] | 1.35 [1.13,1.61] | 1.14 [0.96,1.36] | 1.32 [1.12,1.56] |
| Sex without condom last 4 weeks <sup>c</sup>                | 1.02 [0.82,1.28] | 0.98 [0.79,1.22] | 0.90 [0.72,1.11] | 1.07 [0.87,1.32] |
| Ever same-sex sex                                           | 3.89 [3.04,4.98] | 2.87 [2.22,3.72] | 2.89 [2.23,3.74] | 3.45 [2.69,4.43] |
| 1+ same sex partners last 5 yrs                             | 4.85 [3.63,6.47] | 3.28 [2.41,4.46] | 2.81 [2.04,3.86] | 3.78 [2.80,5.09] |
| STI clinic attendance-last 5 years <sup>d</sup>             | 0.88 [0.72,1.07] | 0.72 [0.58,0.89] | 0.72 [0.59,0.89] | 0.51 [0.41,0.65] |
| STI clinic attendance-last 1 year <sup>d</sup>              | 0.85 [0.63,1.15] | 0.85 [0.62,1.15] | 0.83 [0.61,1.13] | 0.57 [0.40,0.82] |
| Ever STI diagnosis <sup>d</sup>                             | 0.98 [0.78,1.22] | 0.80 [0.63,1.01] | 0.80 [0.64,1.00] | 0.79 [0.62,1.00] |
| Any sex problem <sup>e</sup>                                | 1.27 [1.08,1.50] | 1.14 [0.92,1.41] | 1.19 [0.96,1.48] | 1.01 [0.86,1.19] |
| Ever paid for sex with a woman                              | 0.99 [0.78,1.26] | 1.17 [0.92,1.48] | 1.24 [0.98,1.57] | 1.07 [0.83,1.36] |
| Heterosexual partners lifetime                              | 0.87 [0.76,0.99] | 0.99 [0.87,1.13] | 0.85 [0.74,0.98] | 1.18 [1.03,1.35] |
| Heterosexual partners last 5 yrs                            | 0.69 [0.60,0.80] | 0.86 [0.75,1.00] | 0.69 [0.59,0.80] | 0.88 [0.76,1.01] |
| Heterosexual partners last 1 year                           | 0.63 [0.54,0.74] | 0.59 [0.50,0.70] | 0.53 [0.45,0.63] | 0.81 [0.70,0.95] |
| 1+ new heterosexual partner last year                       | 0.63 [0.52,0.76] | 0.83 [0.70,0.99] | 0.89 [0.75,1.05] | 0.65 [0.54,0.78] |
| Ever taken illicit drugs <sup>d</sup>                       | 1.04 [0.89,1.21] | 0.77 [0.66,0.90] | 0.73 [0.63,0.86] | 0.91 [0.78,1.05] |
| Ever taken cannabis <sup>d</sup>                            | 1.01 [0.87,1.18] | 0.75 [0.64,0.87] | 0.71 [0.61,0.83] | 0.88 [0.75,1.02] |
| One night stands always/mostly wrong                        | 0.67 [0.57,0.78] | 0.87 [0.74,1.01] | 0.89 [0.76,1.03] | 0.67 [0.57,0.78] |
| Adultery always/mostly wrong                                | 0.49 [0.41,0.59] | 0.46 [0.38,0.55] | 0.44 [0.37,0.53] | 0.47 [0.39,0.56] |
| Sex between men always/mostly wrong                         | 0.41 [0.34,0.49] | 0.84 [0.71,0.98] | 0.82 [0.70,0.96] | 0.61 [0.52,0.72] |
| Sex between women always/ mostly wrong                      | 0.39 [0.31,0.48] | 0.75 [0.63,0.90] | 0.75 [0.62,0.90] | 0.49 [0.40,0.60] |
| Easy to talk to parents about sex                           | 0.43 [0.34,0.55] | 0.69[0.56,0.85]  | 0.85 [0.70,1.04] | 0.78 [0.64,0.96] |
| Satisfied with sex life agree/strongly <sup>d</sup>         | 0.39 [0.34,0.46] | 0.59 [0.51,0.69] | 0.70 [0.60,0.81] | 0.52 [0.44,0.60] |
| Distressed about sex life agree/strongly <sup>d</sup>       | 1.60 [1.28,1.99] | 2.18 [1.78,2.67] | 2.24 [1.83,2.75] | 2.12 [1.73,2.60] |
| Avoided sex because of problems agree/strongly <sup>d</sup> | 1.74 [1.39,2.18] | 1.63 [1.29,2.05] | 1.68 [1.33,2.12] | 1.37 [1.08,1.74] |

Questions in green were asked in CAPI, questions in black were asked in CASI.

a=Mixture of face to face and CASI with 11% answering in CASI

b=Based on those who had opposite-sex sex in the last 4 weeks.

c=Based on those who had opposite- or same-sex sex in the last 4 weeks.

d=The base for these variables is limited to participants who completed the CASI questionnaire.

e=For WS-B2 and WS-M1, these responses are based on half the sample only.

| <b>WOMEN</b>                                                | <b>WS-B1</b>     | <b>WS-B2</b>     | <b>WS-M1</b>     | <b>WS-M2</b>     |
|-------------------------------------------------------------|------------------|------------------|------------------|------------------|
| Current smoker                                              | 0.67 [0.57,0.79] | 1.02 [0.88,1.19] | 0.92 [0.79,1.08] | 1.11 [0.95,1.29] |
| Drinks more than recommended amount (14+ units in a week)   | 1.18 [0.96,1.44] | 1.02 [0.83,1.27] | 0.76 [0.60,0.97] | 1.49 [1.22,1.81] |
| Binge drinks once a week or more (6+ units)                 | 1.11 [0.91,1.36] | 0.81 [0.65,1.02] | 0.70 [0.55,0.88] | 1.40 [1.15,1.70] |
| 1st sex % <16                                               | 0.67 [0.56,0.80] | 1.03 [0.87,1.22] | 0.98 [0.83,1.16] | 1.30 [1.11,1.53] |
| 1st sex both equally willing <sup>a</sup>                   | 0.83 [0.70,1.00] | 0.82 [0.68,0.99] | 0.72 [0.60,0.86] | 0.68 [0.57,0.81] |
| 1st sex contraception used <sup>a</sup>                     | 1.46 [1.16,1.84] | 0.84 [0.67,1.05] | 1.11 [0.91,1.37] | 1.03 [0.84,1.27] |
| 1st sex was at right time <sup>a</sup>                      | 0.87 [0.75,1.01] | 0.72 [0.61,0.84] | 0.63 [0.54,0.73] | 0.60 [0.52,0.70] |
| Sex attraction scale – not all opposite sex                 | 2.70 [2.32,3.15] | 2.04 [1.73,2.4]  | 2.09 [1.77,2.46] | 2.65 [2.27,3.11] |
| Sex experience scale – not all opposite sex                 | 2.06 [1.75,2.42] | 1.76 [1.48,2.08] | 1.79 [1.51,2.12] | 2.23 [1.89,2.63] |
| Had vaginal sex last month                                  | 0.70 [0.61,0.08] | 0.64 [0.55,0.74] | 0.65 [0.56,0.75] | 0.91 [0.78,1.06] |
| Had het oral sex last year                                  | 0.78 [0.67,0.91] | 0.72 [0.61,0.84] | 0.68 [0.58,0.79] | 0.99 [0.84,1.17] |
| Had het anal sex last year                                  | 0.86 [0.70,1.04] | 1.09 [0.91,1.32] | 1/10 [0.91,1.32] | 1.23 [1.02,1.48] |
| Het sex 5+ occasions last 4 weeks <sup>b</sup>              | 0.85 [0.70,1.03] | 1.27 [1.05,1.53] | 1.21 [1.01,1.45] | 1.10 [0.92,1.32] |
| Sex without condom last 4 weeks <sup>c</sup>                | 0.98 [0.80,1.22] | 1.07 [0.85,1.33] | 0.88 [0.70,1.11] | 0.84 [0.68,1.05] |
| Ever same-sex sex                                           | 1.91 [1.56,2.34] | 1.68 [1.35,2.09] | 1.72 [1.39,2.13] | 1.89 [1.53,2.33] |
| 1+ same sex partners last 5 yrs                             | 1.37 [1.03,1.81] | 1.33 [1.00,1.79] | 1.50 [1.13,1.98] | 1.27 [0.95,1.71] |
| STI clinic attendance-last 5 years <sup>d</sup>             | 0.96 [0.81,1.14] | 0.89 [0.74,1.07] | 0.91 [0.76,1.09] | 0.83 [0.69,1.01] |
| STI clinic attendance-last 1 year <sup>d</sup>              | 0.80 [0.61,1.05] | 0.69 [0.51,0.92] | 0.74 [0.55,0.98] | 0.80 [0.60,1.06] |
| Ever STI diagnosis <sup>d</sup>                             | 0.85 [0.70,1.02] | 0.89 [0.74,1.08] | 0.89 [0.74,1.07] | 0.95 [0.79,1.15] |
| Any sex problem <sup>e</sup>                                | 1.45 [1.25,1.68] | 1.10 [0.90,1.34] | 1.43 [1.16,1.77] | 1.31 [1.09,1.58] |
| Ever abortion <sup>d</sup>                                  | 0.92 [0.75,1.12] | 0.99 [0.81,1.21] | 1.03 [0.84,1.26] | 1.28 [1.11,1.49] |
| Heterosexual partners lifetime                              | 0.44 [0.38,0.51] | 0.61 [0.53,0.71] | 0.62 [0.54,0.72] | 0.70 [0.60,0.80] |
| Heterosexual partners last 5 yrs                            | 0.49 [0.42,0.58] | 0.64 [0.55,0.74] | 0.68 [0.59,0.79] | 0.66 [0.57,0.77] |
| Heterosexual partners last 1 year                           | 0.45 [0.37,0.53] | 0.48 [0.41,0.56] | 0.67 [0.57,0.78] | 0.56 [0.48,0.66] |
| 1+ new heterosexual partner last year                       | 0.64 [0.53,0.77] | 0.75 [0.63,0.91] | 0.66 [0.55,0.80] | 0.79 [0.66,0.94] |
| Ever taken illicit drugs <sup>d</sup>                       | 1.43 [1.25,1.65] | 1.10 [0.95,1.27] | 1.13 [0.98,1.30] | 1.56 [1.36,1.80] |
| Ever taken cannabis <sup>d</sup>                            | 1.46 [1.27,1.68] | 1.06 [0.91,1.23] | 1.11 [0.96,1.29] | 1.55 [1.34,1.79] |
| One night stands always/mostly wrong                        | 0.58 [0.50,0.66] | 0.60 [0.49,0.74] | 0.78 [0.68,0.90] | 0.67 [0.58,0.77] |
| Adultery always/mostly wrong                                | 0.78 [0.63,0.96] | 0.74 [0.64,0.86] | 0.56 [0.46,0.69] | 0.80 [0.64,1.00] |
| Sex between men always/mostly wrong                         | 0.45 [0.36,0.57] | 0.92 [0.76,1.11] | 0.93 [0.77,1.13] | 1.26 [1.06,1.50] |
| Sex between women always/mostly wrong                       | 0.41 [0.32,0.52] | 0.89 [0.73,1.08] | 0.95 [0.79,1.15] | 1.28 [1.07,1.52] |
| Easy to talk to parents about sex                           | 0.56 [0.47,0.67] | 0.52 [0.43,0.63] | 0.52 [0.43,0.63] | 0.54 [0.45,0.65] |
| Satisfied with sex life agree/strongly <sup>d</sup>         | 0.51 [0.44,0.58] | 0.61 [0.52,0.70] | 0.56 [0.48,0.65] | 0.52 [0.45,0.60] |
| Distressed about sex life agree/strongly <sup>d</sup>       | 2.02 [1.68,2.42] | 1.79 [1.48,2.18] | 1.91 [1.58,2.32] | 2.20 [1.83,2.65] |
| Avoided sex because of problems agree/strongly <sup>d</sup> | 1.94[1.61,2.34]  | 1.74 [1.42,2.12] | 1.82 [1.50,2.22] | 1.70 [1.39,2.07] |

Questions in green were asked in CAPI, questions in black were asked in CASI.

a=Mixture of face to face and CASI with 11% answering in CASI

b=Based on those who had opposite-sex sex in the last 4 weeks.

c=Based on those who had opposite- or same-sex sex in the last 4 weeks.

d=The base for these variables is limited to participants who completed the CASI questionnaire.

e=For WS-B2 and WS-M1, these responses are based on half the sample only.
